# Supplementary material for: Comparative metabolomics of leaves and stems of three Italian olive cultivars under drought stress
Source: PubMed Central journal article supplement (PMC11251969; doi:10.3389/fpls.2024.1408731), 2024-07-03
Supplement: DataSheet_1.pdf [file DataSheet_1.pdf]

## *Supplementary Material*

### *List of contents:*

Figure S1: scheme of the experimental design (p. 2)

Table S1: phenolic profiles of leaves at T0 (p. 3)

Table S2: phenolic profiles of leaves at T2 (p. 4)

Table S3: phenolic profiles of stems at T0 (p. 5)

Table S4: phenolic profiles of stems at T2 (p. 6)

Table S5: phenolic profiles of stems at T4 (p. 7)

Table S6: lipophilic profiles of leaves at T0 (p. 8)

Table S7: lipophilic profiles of leaves at T2 (p. 9)

Table S8: lipophilic profiles of leaves at T4 (p. 10)

Table S9: lipophilic profiles of stems at T0 (p. 11)

Table S10: lipophilic profiles of stems at T2 (p. 12)

Table S11: lipophilic profiles of stems at T4 (p. 13)

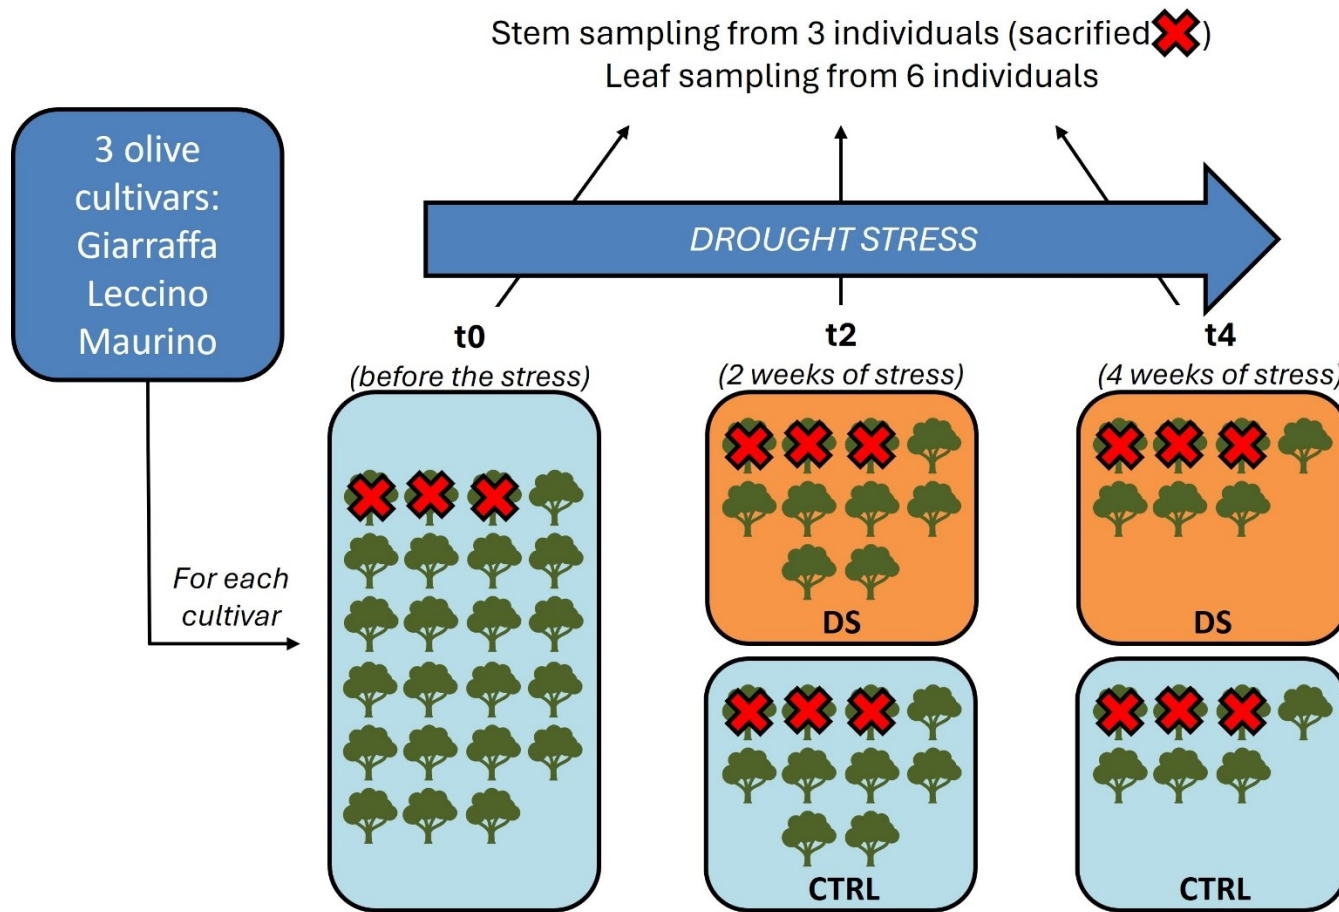

Figure S1. Scheme of the experimental design described in the Material and Methods paragraph.

**Table S1.** Phenolic profile (mg/g DW) of the **leaves** of the Giarraffa (GIA), Leccino (LEC), and Maurino (MAU) cultivars measured under control (CTRL) conditions and exposed to drought stress (DS) before the start of water deprivation (**T0**). The mean values  $\pm$  standard deviation (n = 3–4) are presented. Rt—retention time; nd—not detected; is.—isomer.

| Rt (min.)           | Compound                                     | [M-H]<br>–(m/z) | MS2 (m/z)<br>Fragments | GIA CTRL          | GIA DS            | LEC CTRL          | LEC DS            | MAU CTRL          | MAU DS            |
|---------------------|----------------------------------------------|-----------------|------------------------|-------------------|-------------------|-------------------|-------------------|-------------------|-------------------|
| <b>secoiridoids</b> |                                              |                 |                        |                   |                   |                   |                   |                   |                   |
| 10.3                | oleuropein aglicone                          | 377             | 197/153                | 1.052 $\pm$ 0.136 | 1.026 $\pm$ 0.139 | nd                | nd                | 0.878 $\pm$ 0.011 | 0.876 $\pm$ 0.010 |
| 10.8                | aldehydic form of decarboxyl elenolic acid   | 215             | 197/153/<br>171/ 185   | 0.406 $\pm$ 0.073 | 0.411 $\pm$ 0.084 | 4.498 $\pm$ 0.396 | 4.501 $\pm$ 0.404 | 0.561 $\pm$ 0.100 | 0.559 $\pm$ 0.105 |
| 14.4                | oleuropein                                   | 539             | 377/307/275            | 1.183 $\pm$ 0.207 | 1.180 $\pm$ 0.225 | nd                | nd                | 2.469 $\pm$ 0.026 | 2.464 $\pm$ 0.023 |
| <b>flavonoids</b>   |                                              |                 |                        |                   |                   |                   |                   |                   |                   |
| 11.9                | dihydroquercetin                             | 303             | 285/177/<br>125        | 2.407 $\pm$ 0.113 | 2.412 $\pm$ 0.098 | 2.779 $\pm$ 0.074 | 2.783 $\pm$ 0.055 | 3.263 $\pm$ 0.050 | 3.271 $\pm$ 0.033 |
| 12.1                | luteolin-7- <i>O</i> -rutinoside             | 593             | 447/285                | nd                | nd                | 2.724 $\pm$ 0.013 | 2.722 $\pm$ 0.012 | 3.830 $\pm$ 0.144 | 2.837 $\pm$ 0.067 |
| 12.1                | luteolin-7- <i>O</i> -glucoside is.1         | 447             | 287/285                | 2.003 $\pm$ 0.030 | 1.997 $\pm$ 0.008 | nd                | nd                | nd                | nd                |
| 12.4                | apigenin- <i>O</i> -dideoxyhexoside-hexoxide | 449             | 269                    | 1.812 $\pm$ 0.023 | 1.809 $\pm$ 0.018 | 2.842 $\pm$ 0.014 | 2.842 $\pm$ 0.013 | 2.167 $\pm$ 0.002 | 2.167 $\pm$ 0.002 |
| 12.8                | apigenin-7- <i>O</i> -rutinoside is.1        | 577             | 269                    | 3.293 $\pm$ 0.018 | 3.296 $\pm$ 0.022 | 5.201 $\pm$ 0.073 | 5.194 $\pm$ 0.085 | 2.570 $\pm$ 0.006 | 2.570 $\pm$ 0.007 |
| 13.0                | apigenin-7- <i>O</i> -rutinoside is.2        | 577             | 269                    | 2.436 $\pm$ 0.183 | 2.420 $\pm$ 0.117 | 3.085 $\pm$ 0.035 | 3.083 $\pm$ 0.036 | 2.194 $\pm$ 0.029 | 2.198 $\pm$ 0.016 |
| 13.3                | luteolin-7- <i>O</i> -glucoside is.2         | 447             | 285                    | 3.454 $\pm$ 0.090 | 3.486 $\pm$ 0.007 | 3.017 $\pm$ 0.154 | 3.002 $\pm$ 0.058 | 3.930 $\pm$ 0.025 | 3.932 $\pm$ 0.027 |
| 13.5                | chrysoeriol-7- <i>O</i> -glucoside           | 461             | 299/446                | 2.154 $\pm$ 0.058 | 2.151 $\pm$ 0.061 | nd                | nd                | 2.784 $\pm$ 0.025 | 2.783 $\pm$ 0.019 |
| 13.9                | luteolin-7- <i>O</i> -glucoside is.3         | 447             | 285                    | 2.158 $\pm$ 0.144 | 2.156 $\pm$ 0.108 | nd                | nd                | 2.489 $\pm$ 0.007 | 2.488 $\pm$ 0.007 |
| 15.7                | luteolin                                     | 285             | 285                    | 2.515 $\pm$ 0.050 | 2.513 $\pm$ 0.025 | 7.731 $\pm$ 0.177 | 7.737 $\pm$ 0.185 | 4.571 $\pm$ 0.007 | 4.552 $\pm$ 0.017 |
| 16.7                | apigenin-7- <i>O</i> -rutinoside             | 577             | 269                    | 1.990 $\pm$ 0.015 | 1.994 $\pm$ 0.033 | 2.263 $\pm$ 0.014 | 2.258 $\pm$ 0.039 | 2.145 $\pm$ 0.008 | 2.146 $\pm$ 0.009 |
| 17.4                | apigenin                                     | 269             | 269/225                | 2.496 $\pm$ 0.049 | 2.497 $\pm$ 0.054 | 6.477 $\pm$ 0.099 | 6.473 $\pm$ 0.096 | 2.720 $\pm$ 0.008 | 2.720 $\pm$ 0.007 |
| 17.8                | diosmetin                                    | 299             | 284                    | 2.526 $\pm$ 0.067 | 2.521 $\pm$ 0.054 | 3.112 $\pm$ 0.014 | 3.112 $\pm$ 0.018 | 3.305 $\pm$ 0.014 | 3.303 $\pm$ 0.009 |

**Table S2.** Phenolic profile (mg/g DW) of the **leaves** of the Giarraffa (GIA), Leccino (LEC), and Maurino (MAU) cultivars measured under control (CTRL) conditions and exposed to drought stress (DS) for two weeks (**T2**). The mean values  $\pm$  standard deviation ( $n = 3-4$ ) are presented. Rt—retention time; nd—not detected; is.—isomer.

| Rt (min.)           | Compound                                             | [M-H]<br>-(m/z) | MS2 (m/z)<br>Fragments | GIA CTRL          | GIA DS            | LEC CTRL          | LEC DS            | MAU CTRL          | MAU DS            |
|---------------------|------------------------------------------------------|-----------------|------------------------|-------------------|-------------------|-------------------|-------------------|-------------------|-------------------|
| <b>secoiridoids</b> |                                                      |                 |                        |                   |                   |                   |                   |                   |                   |
| 10.3                | oleuropein aglicone                                  | 377             | 197/153                | 1.000 $\pm$ 0.144 | 0.811 $\pm$ 0.012 | nd                | nd                | 0.878 $\pm$ 0.011 | 2.020 $\pm$ 0.007 |
| 10.8                | aldehydic form of<br>decarboxyl elenolic<br>acid     | 215             | 197/153/<br>171/185    | 0.416 $\pm$ 0.095 | 0.611 $\pm$ 0.062 | 4.505 $\pm$ 0.413 | 0.704 $\pm$ 0.049 | 0.557 $\pm$ 0.110 | 0.801 $\pm$ 0.079 |
| 14.4                | oleuropein                                           | 539             | 377/307/275            | 1.177 $\pm$ 0.247 | 0.512 $\pm$ 0.074 | nd                | 1.208 $\pm$ 0.636 | 2.459 $\pm$ 0.027 | 3.731 $\pm$ 0.321 |
| <b>flavonoids</b>   |                                                      |                 |                        |                   |                   |                   |                   |                   |                   |
| 11.9                | dihydroquercetin                                     | 303             | 285/177/<br>125        | 2.418 $\pm$ 0.096 | 2.894 $\pm$ 0.060 | 2.787 $\pm$ 0.044 | 1.920 $\pm$ 0.035 | 3.280 $\pm$ 0.017 | 3.767 $\pm$ 0.560 |
| 12.1                | luteolin-7- <i>O</i> -rutinoside                     | 593             | 447/285                | nd                | nd                | 2.720 $\pm$ 0.011 | 1.920 $\pm$ 0.070 | 2.845 $\pm$ 0.017 | 3.417 $\pm$ 0.185 |
| 12.1                | luteolin-7- <i>O</i> -glucoside<br>is.1              | 447             | 287/285                | 1.991 $\pm$ 0.044 | 2.302 $\pm$ 0.006 | nd                | nd                | nd                | nd                |
| 12.4                | apigenin- <i>O</i> -<br>dideoxyhexoside-<br>hexoxide | 449             | 269                    | 1.806 $\pm$ 0.021 | 1.875 $\pm$ 0.010 | 2.842 $\pm$ 0.016 | 2.602 $\pm$ 0.058 | 2.167 $\pm$ 0.003 | 2.228 $\pm$ 0.009 |
| 12.8                | apigenin-7- <i>O</i> -<br>rutinoside is.1            | 577             | 269                    | 3.299 $\pm$ 0.053 | 3.173 $\pm$ 0.042 | 5.188 $\pm$ 0.097 | 4.438 $\pm$ 0.132 | 2.569 $\pm$ 0.008 | 3.196 $\pm$ 0.017 |
| 13.0                | apigenin-7- <i>O</i> -<br>rutinoside is.2            | 577             | 269                    | 2.403 $\pm$ 0.069 | 2.311 $\pm$ 0.043 | 3.081 $\pm$ 0.038 | 3.052 $\pm$ 0.086 | 2.202 $\pm$ 0.004 | 2.517 $\pm$ 0.049 |
| 13.3                | luteolin-7- <i>O</i> -glucoside<br>is.2              | 447             | 285                    | 3.518 $\pm$ 0.078 | 3.725 $\pm$ 0.065 | 2.987 $\pm$ 0.252 | 2.115 $\pm$ 0.065 | 3.933 $\pm$ 0.029 | 5.708 $\pm$ 0.030 |
| 13.5                | chrysoeriol-7- <i>O</i> -<br>glucoside               | 461             | 299/446                | 2.147 $\pm$ 0.065 | 2.057 $\pm$ 0.039 | nd                | nd                | 2.783 $\pm$ 0.016 | 3.447 $\pm$ 0.016 |
| 13.9                | luteolin-7- <i>O</i> -glucoside<br>is.3              | 447             | 285                    | 2.154 $\pm$ 0.126 | 2.023 $\pm$ 0.059 | nd                | nd                | 2.488 $\pm$ 0.007 | 2.750 $\pm$ 0.036 |
| 15.7                | luteolin                                             | 285             | 285                    | 2.510 $\pm$ 0.049 | 3.519 $\pm$ 0.020 | 7.743 $\pm$ 0.213 | 3.666 $\pm$ 0.096 | 4.532 $\pm$ 0.039 | 3.458 $\pm$ 0.010 |
| 16.7                | apigenin-7- <i>O</i> -<br>rutinoside                 | 577             | 269                    | 1.999 $\pm$ 0.051 | 1.813 $\pm$ 0.040 | 2.253 $\pm$ 0.064 | 1.802 $\pm$ 0.046 | 2.146 $\pm$ 0.010 | 3.505 $\pm$ 1.793 |
| 17.4                | apigenin                                             | 269             | 269/225                | 2.497 $\pm$ 0.059 | 2.331 $\pm$ 0.060 | 6.469 $\pm$ 0.096 | 5.102 $\pm$ 0.180 | 2.720 $\pm$ 0.007 | 2.627 $\pm$ 0.009 |
| 17.8                | diosmetin                                            | 299             | 284                    | 2.516 $\pm$ 0.042 | 2.332 $\pm$ 0.072 | 3.111 $\pm$ 0.022 | 2.102 $\pm$ 0.041 | 3.300 $\pm$ 0.008 | 2.579 $\pm$ 0.005 |

**Table S3.** Phenolic profile (mg/g DW) of the **stems** of the Giarraffa (GIA), Leccino (LEC), and Maurino (MAU) cultivars measured under control (CTRL) conditions and exposed to drought stress (DS) before the start of water deprivation (**T0**). The mean values  $\pm$  standard deviation (n = 3–4) are presented.

| Rt (min.) | Compound                               | [M-H]<br>-(m/z) | MS2 (m/z)<br>Fragments | GIA CTRL          | GIA DS            | LEC CTRL          | LEC DS            | MAU CTRL          | MAU DS            |
|-----------|----------------------------------------|-----------------|------------------------|-------------------|-------------------|-------------------|-------------------|-------------------|-------------------|
|           | <b>secoiridoids</b>                    |                 |                        |                   |                   |                   |                   |                   |                   |
| 14.4      | oleuropein                             | 539             | 377/275                | 0.779 $\pm$ 0.125 | 0.776 $\pm$ 0.137 | 1.410 $\pm$ 0.280 | 1.412 $\pm$ 0.284 | 3.893 $\pm$ 0.704 | 3.891 $\pm$ 0.694 |
| 15.4      | fraxamoside                            | 537             | 223/375                | nd                | nd                | 2.557 $\pm$ 0.554 | 2.560 $\pm$ 0.551 | nd                | nd                |
|           | <b>flavonoids</b>                      |                 |                        |                   |                   |                   |                   |                   |                   |
| 11.9      | dihydroquercetin                       | 303             | 285/177/<br>125        | 2.992 $\pm$ 0.544 | 2.994 $\pm$ 0.541 | 5.630 $\pm$ 1.205 | 5.615 $\pm$ 1.215 | 3.425 $\pm$ 0.592 | 3.423 $\pm$ 0.602 |
| 12.8      | quercetin-3- <i>O</i> -<br>glucoside   | 463             | 301                    | 2.336 $\pm$ 0.378 | 2.336 $\pm$ 0.379 | 2.517 $\pm$ 0.384 | 2.518 $\pm$ 0.383 | 2.057 $\pm$ 0.226 | 2.054 $\pm$ 0.231 |
| 13.5      | chrysoeriol-7- <i>O</i> -<br>glucoside | 461             | 299/446                | 1.028 $\pm$ 0.134 | 1.027 $\pm$ 0.138 | 1.159 $\pm$ 0.129 | 1.159 $\pm$ 0.129 | 1.088 $\pm$ 0.063 | 1.092 $\pm$ 0.054 |
| 13.6      | luteolin-7- <i>O</i> -glucoside        | 447             | 285                    | 9.841 $\pm$ 1.608 | 9.844 $\pm$ 1.667 | 4.284 $\pm$ 0.715 | 4.308 $\pm$ 0.740 | 3.565 $\pm$ 0.533 | 3.566 $\pm$ 0.532 |
| 15.5      | quercetin                              | 301             | 285/257                | 0.751 $\pm$ 0.036 | 0.752 $\pm$ 0.035 | 1.272 $\pm$ 0.103 | 1.272 $\pm$ 0.107 | 1.049 $\pm$ 0.052 | 1.050 $\pm$ 0.052 |
| 17.4      | apigenin                               | 269             | 149                    | 2.134 $\pm$ 0.293 | 2.131 $\pm$ 0.287 | 1.195 $\pm$ 0.090 | 1.195 $\pm$ 0.088 | 0.944 $\pm$ 0.028 | 0.944 $\pm$ 0.030 |
| 15.8      | luteolin                               | 285             | 285                    | 1.109 $\pm$ 0.122 | 1.106 $\pm$ 0.110 | 1.199 $\pm$ 0.076 | 1.198 $\pm$ 0.086 | 1.152 $\pm$ 0.062 | 1.151 $\pm$ 0.066 |

**Table S4.** Phenolic profile (mg/g DW) of the **stems** of the Giarraffa (GIA), Leccino (LEC), and Maurino (MAU) cultivars measured under control (CTRL) conditions and exposed to drought stress (DS) for two weeks (**T2**). The mean values  $\pm$  standard deviation ( $n = 3-4$ ) are presented. Rt—retention time; nd—not detected.

| Rt (min.)           | Compound                           | [M-H]<br>-(m/z) | MS2 (m/z)<br>Fragments | GIA CTRL          | GIA DS            | LEC CTRL          | LEC DS            | MAU CTRL          | MAU DS            |
|---------------------|------------------------------------|-----------------|------------------------|-------------------|-------------------|-------------------|-------------------|-------------------|-------------------|
| <b>secoiridoids</b> |                                    |                 |                        |                   |                   |                   |                   |                   |                   |
| 14.4                | oleuropein                         | 539             | 377/275                | 0.773 $\pm$ 0.149 | 0.687 $\pm$ 0.171 | 1.141 $\pm$ 0.289 | 1.306 $\pm$ 0.242 | 3.889 $\pm$ 0.684 | 4.382 $\pm$ 0.870 |
| 15.4                | fraxamoside                        | 537             | 223/375                | nd                | nd                | 2.562 $\pm$ 0.549 | 2.646 $\pm$ 0.553 | nd                | nd                |
| <b>flavonoids</b>   |                                    |                 |                        |                   |                   |                   |                   |                   |                   |
| 11.9                | dihydroquercetin                   | 303             | 285/177/<br>125        | 2.997 $\pm$ 0.538 | 2.718 $\pm$ 0.625 | 5.600 $\pm$ 1.225 | 4.025 $\pm$ 0.841 | 3.421 $\pm$ 0.612 | 4.036 $\pm$ 0.735 |
| 12.8                | quercetin-3- <i>O</i> -glucoside   | 463             | 301                    | 2.336 $\pm$ 0.381 | 2.120 $\pm$ 0.444 | 2.519 $\pm$ 0.381 | 2.036 $\pm$ 0.251 | 2.054 $\pm$ 0.230 | 2.591 $\pm$ 0.324 |
| 13.5                | chrysoeriol-7- <i>O</i> -glucoside | 461             | 299/446                | 1.025 $\pm$ 0.142 | 0.961 $\pm$ 0.164 | 1.159 $\pm$ 0.130 | 0.866 $\pm$ 0.088 | 1.097 $\pm$ 0.058 | 1.406 $\pm$ 0.112 |
| 13.6                | luteolin-7- <i>O</i> -glucoside    | 447             | 285                    | 9.848 $\pm$ 1.726 | 8.711 $\pm$ 2.143 | 4.332 $\pm$ 0.765 | 2.662 $\pm$ 0.410 | 3.568 $\pm$ 0.532 | 4.287 $\pm$ 0.623 |
| 15.5                | quercetin                          | 301             | 285/257                | 0.753 $\pm$ 0.035 | 0.723 $\pm$ 0.042 | 1.271 $\pm$ 0.111 | 0.969 $\pm$ 0.094 | 1.050 $\pm$ 0.052 | 1.326 $\pm$ 0.124 |
| 17.4                | apigenin                           | 269             | 149                    | 2.128 $\pm$ 0.281 | 1.935 $\pm$ 0.336 | 1.196 $\pm$ 0.086 | 0.908 $\pm$ 0.059 | 0.945 $\pm$ 0.033 | 1.557 $\pm$ 0.253 |
| 15.8                | luteolin                           | 285             | 285                    | 1.102 $\pm$ 0.102 | 1.032 $\pm$ 0.118 | 1.197 $\pm$ 0.095 | 0.857 $\pm$ 0.051 | 1.150 $\pm$ 0.069 | 1.818 $\pm$ 0.178 |

**Table S5.** Phenolic profile (mg/g DW) of the stems of the Giarraffa (GIA), Leccino (LEC), and Maurino (MAU) cultivars measured under control (CTRL) conditions and exposed to drought stress (DS) for four weeks (T4). The mean values  $\pm$  standard deviation (n = 3–4) are presented. Rt—retention time; nd—not detected.

| Rt (min.) | Compound                           | [M-H]–(m/z) | MS2 (m/z) Fragments | GIA CTRL          | GIA DS            | LEC CTRL          | LEC DS            |
|-----------|------------------------------------|-------------|---------------------|-------------------|-------------------|-------------------|-------------------|
|           | <b>secoiridoids</b>                |             |                     |                   |                   |                   |                   |
| 14.4      | oleuropein                         | 539         | 377/275             | 0.723 $\pm$ 0.096 | 0.924 $\pm$ 0.131 | 1.238 $\pm$ 0.232 | 1.333 $\pm$ 0.294 |
| 15.4      | fraxamoside                        | 537         | 223/375             | nd                | nd                | 2.191 $\pm$ 0.396 | 0.979 $\pm$ 0.245 |
|           | <b>flavonoids</b>                  |             |                     |                   |                   |                   |                   |
| 11.9      | dihydroquercetin                   | 303         | 285/177/<br>125     | 2.823 $\pm$ 0.373 | 3.914 $\pm$ 0.483 | 4.854 $\pm$ 0.931 | 3.757 $\pm$ 0.773 |
| 12.8      | quercetin-3- <i>O</i> -glucoside   | 463         | 301                 | 2.213 $\pm$ 0.260 | 2.606 $\pm$ 0.308 | 2.158 $\pm$ 0.276 | 2.230 $\pm$ 0.426 |
| 13.5      | chrysoeriol-7- <i>O</i> -glucoside | 461         | 299/446             | 0.996 $\pm$ 0.107 | 1.249 $\pm$ 0.078 | 1.005 $\pm$ 0.119 | 1.122 $\pm$ 0.258 |
| 13.6      | luteolin-7- <i>O</i> -glucoside    | 447         | 285                 | 9.301 $\pm$ 1.178 | 13.66 $\pm$ 2.081 | 3.751 $\pm$ 0.583 | 4.407 $\pm$ 0.857 |
| 15.5      | quercetin                          | 301         | 285/257             | 0.762 $\pm$ 0.024 | 0.946 $\pm$ 0.048 | 1.106 $\pm$ 0.083 | 0.866 $\pm$ 0.052 |
| 17.4      | apigenin                           | 269         | 149                 | 2.050 $\pm$ 0.187 | 2.091 $\pm$ 0.230 | 1.019 $\pm$ 0.064 | 1.147 $\pm$ 0.101 |
| 15.8      | luteolin                           | 285         | 285                 | 1.100 $\pm$ 0.070 | 1.376 $\pm$ 0.117 | 1.029 $\pm$ 0.068 | 0.976 $\pm$ 0.069 |

**Table S6.** Lipophilic profile (mg/g DW) of the **leaves** of the Giarraffa (GIA), Leccino (LEC), and Maurino (MAU) cultivars measured under control (CTRL) conditions and exposed to drought stress (DS) before the start of water deprivation (**T0**). The mean values  $\pm$  standard deviation (n = 3–4) are presented. Rt—retention time; nd—not detected.

| Rt (min.)                   | Compound                           | GIA CTRL           | GIA DS             | LEC CTRL          | LEC DS             | MAU CTRL           | MAU DS            |
|-----------------------------|------------------------------------|--------------------|--------------------|-------------------|--------------------|--------------------|-------------------|
| <b>sterols and terpenes</b> |                                    |                    |                    |                   |                    |                    |                   |
| 34.0                        | neophytadiene                      | 0.966 $\pm$ 0.019  | 0.963 $\pm$ 0.014  | 0.608 $\pm$ 0.011 | 0.611 $\pm$ 0.008  | 0.647 $\pm$ 0.014  | 0.648 $\pm$ 0.014 |
| 42.1                        | phytol                             | nd                 | nd                 | 0.588 $\pm$ 0.002 | 0.589 $\pm$ 0.001  | nd                 | nd                |
| 55.4                        | squalene                           | nd                 | nd                 | 0.613 $\pm$ 0.011 | 0.608 $\pm$ 0.004  | 0.601 $\pm$ 0.011  | 0.605 $\pm$ 0.007 |
| 68.0                        | $\beta$ - amyrin                   | 1.321 $\pm$ 0.102  | 1.324 $\pm$ 0.212  | 0.689 $\pm$ 0.010 | 0.689 $\pm$ 0.013  | 0.731 $\pm$ 0.0315 | 0.733 $\pm$ 0.038 |
| 69.0                        | $\alpha$ - amyrin                  | 1.419 $\pm$ 0.419  | 1.442 $\pm$ 0.408  | 0.647 $\pm$ 0.006 | 0.646 $\pm$ 0.000  | 0.677 $\pm$ 0.011  | 0.675 $\pm$ 0.013 |
| 72.8                        | lupeol derivatives                 | 2.311 $\pm$ 0.534  | 2.307 $\pm$ 0.547  | 0.679 $\pm$ 0.010 | 0.679 $\pm$ 0.001  | 0.654 $\pm$ 0.011  | 0.655 $\pm$ 0.011 |
| 73.4                        | ursolic acid                       | 1.689 $\pm$ 0.593  | 1.682 $\pm$ 0.547  | 0.831 $\pm$ 0.027 | 0.830 $\pm$ 0.023  | 1.085 $\pm$ 0.107  | 1.083 $\pm$ 0.120 |
| 73.6                        | ursolic acid aldehyde              | nd                 | nd                 | 0.672 $\pm$ 0.018 | 0.668 $\pm$ 0.036  | 0.731 $\pm$ 0.029  | 0.730 $\pm$ 0.036 |
| <b>sugars</b>               |                                    |                    |                    |                   |                    |                    |                   |
| 35.5                        | $\alpha$ - D - mannopyranose       | nd                 | nd                 | 0.173 $\pm$ 0.006 | 0.173 $\pm$ 0.002  | 0.196 $\pm$ 0.010  | 0.194 $\pm$ 0.010 |
| 37.7                        | D - glucose                        | 0.250 $\pm$ 0.009  | 0.251 $\pm$ 0.008  | 0.188 $\pm$ 0.003 | 0.188 $\pm$ 0.002  |                    |                   |
| <b>alcohols</b>             |                                    |                    |                    |                   |                    |                    |                   |
| 36.3                        | D - sorbitol                       | 1.092 $\pm$ 0.034  | 1.094 $\pm$ 0.039  | 0.814 $\pm$ 0.010 | 0.815 $\pm$ 0.013  | 0.875 $\pm$ 0.094  | 0.871 $\pm$ 0.007 |
| 63.0                        | $\alpha$ - tocopherol              | nd                 | nd                 | 0.670 $\pm$ 0.010 | 0.675 $\pm$ 0.011  | nd                 | nd                |
| <b>fatty acids</b>          |                                    |                    |                    |                   |                    |                    |                   |
| 39.2                        | palmitic acid                      | 11.393 $\pm$ 0.318 | 11.392 $\pm$ 0.298 | 7.411 $\pm$ 0.087 | 7.416 $\pm$ 0.150  | 7.750 $\pm$ 0.668  | 7.752 $\pm$ 0.535 |
| 42.8                        | linoleic acid                      | nd                 | nd                 | 6.472 $\pm$ 0.030 | 6.468 $\pm$ 0.010  | 6.419 $\pm$ 0.008  | 6.420 $\pm$ 0.003 |
| 42.9                        | $\alpha$ - linolenic acid          | 10.450 $\pm$ 0.019 | 10.497 $\pm$ 0.043 | nd                | nd                 | nd                 | nd                |
| 43.1                        | oleic acid                         | nd                 | nd                 | 7.372 $\pm$ 0.415 | 7.374 $\pm$ 0.548  | 6.635 $\pm$ 0.005  | 6.635 $\pm$ 0.023 |
| 43.2                        | oleic acid derivative              | nd                 | nd                 | 6.505 $\pm$ 0.057 | 6.508 $\pm$ 0.0778 | 6.417 $\pm$ 0.006  | 6.417 $\pm$ 0.004 |
| 43.7                        | stearic acid                       | 10.865 $\pm$ 0.057 | 10.867 $\pm$ 0.072 | 7.011 $\pm$ 0.109 | 6.989 $\pm$ 0.090  | 7.739 $\pm$ 0.100  | 7.236 $\pm$ 0.185 |
| 45.5                        | $\alpha$ - monopalmitin            | 10.283 $\pm$ 0.031 | 10.283 $\pm$ 0.036 | 6.469 $\pm$ 0.036 | 6.464 $\pm$ 0.014  | 6.544 $\pm$ 0.033  | 6.549 $\pm$ 0.041 |
| 50.7                        | $\alpha$ - monopalmitin derivative | 10.420 $\pm$ 0.028 | 10.420 $\pm$ 0.050 | 6.540 $\pm$ 0.010 | 6.537 $\pm$ 0.009  | 6.701 $\pm$ 0.098  | 6.704 $\pm$ 0.096 |
| <b>alkanes</b>              |                                    |                    |                    |                   |                    |                    |                   |
| 57.6                        | long chain alkane 1                | 1.603 $\pm$ 0.097  | 1.606 $\pm$ 0.107  | 0.897 $\pm$ 0.012 | 0.896 $\pm$ 0.003  | 1.122 $\pm$ 0.088  | 1.117 $\pm$ 0.104 |
| 62.6                        | long chain alkane 2                | 2.109 $\pm$ 0.219  | 2.107 $\pm$ 0.226  | 1.193 $\pm$ 0.050 | 1.191 $\pm$ 0.047  | 1.544 $\pm$ 0.138  | 1.545 $\pm$ 0.169 |
| 67.7                        | long chain alkane 3                | 2.931 $\pm$ 0.737  | 2.929 $\pm$ 0.760  | 1.630 $\pm$ 0.141 | 1.625 $\pm$ 0.062  | 2.289 $\pm$ 0.343  | 2.286 $\pm$ 0.208 |
| 73.0                        | long chain alkane 4                | 1.993 $\pm$ 0.448  | 1.999 $\pm$ 0.189  | 1.004 $\pm$ 0.021 | 1.003 $\pm$ 0.076  | 1.230 $\pm$ 0.111  | 1.229 $\pm$ 0.065 |



**Table S7.** Lipophilic profile (mg/g DW) of the leaves of the Giarraffa (GIA), Leccino (LEC), and Maurino (MAU) cultivars measured under control (CTRL) conditions and exposed to drought stress (DS) for two weeks (T2). The mean values  $\pm$  standard deviation (n = 3–4) are presented. Rt—retention time; nd—not detected.

| Rt (min.)                   | Compound                           | GIA CTRL          | GIA DS             | LEC CTRL           | LEC DS            | MAU CTRL          | MAU DS            |
|-----------------------------|------------------------------------|-------------------|--------------------|--------------------|-------------------|-------------------|-------------------|
| <b>sterols and terpenes</b> |                                    |                   |                    |                    |                   |                   |                   |
| 34.0                        | neophytadiene                      | 0.961 $\pm$ 0.012 | nd                 | 0.613 $\pm$ 0.006  | 0.604 $\pm$ 0.011 | 0.649 $\pm$ 0.027 | 0.772 $\pm$ 0.002 |
| 42.1                        | phytol                             | nd                | nd                 | 0.590 $\pm$ 0.001  | 0.571 $\pm$ 0.002 | 0.597 $\pm$ 0.012 | nd                |
| 55.4                        | squalene                           | nd                | nd                 | 0.604 $\pm$ 0.008  | 0.588 $\pm$ 0.007 | 0.610 $\pm$ 0.004 | 0.798 $\pm$ 0.005 |
| 68.0                        | $\beta$ - amyryl                   | 1.327 $\pm$ 0.367 | 1.187 $\pm$ 0.045  | 0.689 $\pm$ 0.017  | 0.688 $\pm$ 0.081 | 0.735 $\pm$ 0.044 | 0.905 $\pm$ 0.030 |
| 69.0                        | $\alpha$ - amyryl                  | 1.425 $\pm$ 0.399 | 1.149 $\pm$ 0.127  | 0.645 $\pm$ 0.006  | 0.678 $\pm$ 0.050 | 0.674 $\pm$ 0.014 | 0.946 $\pm$ 0.050 |
| 72.8                        | lupeol derivatives                 | 2.302 $\pm$ 0.686 | 1.523 $\pm$ 0.092  | 0.678 $\pm$ 0.010  | 0.785 $\pm$ 0.057 | 0.658 $\pm$ 0.016 | 1.246 $\pm$ 0.045 |
| 73.4                        | ursolic acid                       | 1.675 $\pm$ 0.511 | 1.474 $\pm$ 0.006  | 0.829 $\pm$ 0.049  | 1.098 $\pm$ 0.133 | 1.082 $\pm$ 0.136 | 1.114 $\pm$ 0.043 |
| 73.6                        | ursolic acid aldehyde              | 1.348 $\pm$ 0.570 | nd                 | 0.662 $\pm$ 0.017  | 0.732 $\pm$ 0.063 | 0.128 $\pm$ 0.048 | 0.883 $\pm$ 0.026 |
| <b>sugars</b>               |                                    |                   |                    |                    |                   |                   |                   |
| 35.5                        | $\alpha$ - D - mannopyranose       | nd                | nd                 | 0.173 $\pm$ 0.002  | 0.165 $\pm$ 0.005 | 0.192 $\pm$ 0.022 | 0.192 $\pm$ 0.002 |
| 37.7                        | D - glucose                        | 0.252 $\pm$ 0.008 | nd                 | 0.188 $\pm$ 0.004  | 0.179 $\pm$ 0.008 | 0.215 $\pm$ 0.026 | 0.197 $\pm$ 0.002 |
| <b>alcohols</b>             |                                    |                   |                    |                    |                   |                   |                   |
| 36.3                        | D - sorbitol                       | 1.095 $\pm$ 0.045 | nd                 | 0.817 $\pm$ 0.022  | 0.884 $\pm$ 0.055 | 0.868 $\pm$ 0.108 | 0.861 $\pm$ 0.018 |
| 63.0                        | $\alpha$ - tocopherol              | nd                | nd                 | 0.680 $\pm$ 0.013  | 0.731 $\pm$ 0.074 | 0.669 $\pm$ 0.017 | nd                |
| <b>fatty acids</b>          |                                    |                   |                    |                    |                   |                   |                   |
| 39.2                        | palmitic acid                      | 11.39 $\pm$ 0.28  | 11.47 $\pm$ 0.09   | 7.422 $\pm$ 0.218  | 7.203 $\pm$ 0.149 | 7.754 $\pm$ 0.421 | 12.26 $\pm$ 5.20  |
| 42.8                        | linoleic acid                      | nd                | nd                 | 6.466 $\pm$ 0.018  | 6.135 $\pm$ 0.005 | 6.422 $\pm$ 0.010 | 8.323 $\pm$ 0.004 |
| 42.9                        | $\alpha$ - linolenic acid          | 10.50 $\pm$ 0.10  | 10.74 $\pm$ 0.02   | 6.384 $\pm$ 0.034  | nd                | nd                | nd                |
| 43.1                        | oleic acid                         | nd                | nd                 | 7.376 $\pm$ 0.681  | 6.611 $\pm$ 0.021 | 6.635 $\pm$ 0.045 | 9.070 $\pm$ 1.052 |
| 43.2                        | oleic acid derivative              | nd                | nd                 | 6.511 $\pm$ 0.148  | 6.177 $\pm$ 0.016 | 6.417 $\pm$ 0.003 | 8.333 $\pm$ 0.015 |
| 43.7                        | stearic acid                       | 10.84 $\pm$ 0.139 | 11.14 $\pm$ 0.071  | 6.967 $\pm$ 0.129  | 6.798 $\pm$ 0.077 | 7.233 $\pm$ 0.269 | 8.904 $\pm$ 0.043 |
| 45.5                        | $\alpha$ - monopalmitin            | 10.28 $\pm$ 0.042 | 10.66 $\pm$ 0.015  | 6.459 $\pm$ 0.009  | 6.229 $\pm$ 0.027 | 6.554 $\pm$ 0.063 | 8.415 $\pm$ 0.015 |
| 50.7                        | $\alpha$ - monopalmitin derivative | 10.42 $\pm$ 0.072 | 10.76 $\pm$ 0.041  | 6.533 $\pm$ 0.018  | 6.350 $\pm$ 0.046 | 6.707 $\pm$ 0.112 | 8.470 $\pm$ 0.132 |
| <b>alkanes</b>              |                                    |                   |                    |                    |                   |                   |                   |
| 57.6                        | long chain alkane 1                | 1.610 $\pm$ 0.118 | 1.594 $\pm$ 0.066  | 0.894 $\pm$ 0.0139 | 0.926 $\pm$ 0.042 | 1.113 $\pm$ 0.126 | 1.236 $\pm$ 0.023 |
| 62.6                        | long chain alkane 2                | 2.105 $\pm$ 0.234 | 2.233 $\pm$ 0.080  | 1.190 $\pm$ 0.089  | 1.297 $\pm$ 0.113 | 1.545 $\pm$ 0.230 | 1.552 $\pm$ 0.057 |
| 67.7                        | long chain alkane 3                | 2.926 $\pm$ 0.806 | 2.656 $\pm$ 0.0725 | 1.620 $\pm$ 0.195  | 2.127 $\pm$ 0.277 | 2.283 $\pm$ 0.490 | 1.908 $\pm$ 0.135 |
| 73.0                        | long chain alkane 4                | 2.001 $\pm$ 0.477 | 1.760 $\pm$ 0.046  | 1.002 $\pm$ 0.137  | 1.364 $\pm$ 0.179 | 1.229 $\pm$ 0.133 | 1.255 $\pm$ 0.017 |

**Table S8.** Lipophilic profile (mg/g DW) of the leaves of the Giarraffa (GIA), Leccino (LEC), and Maurino (MAU) cultivars measured under control (CTRL) conditions and exposed to drought stress (DS) for four weeks (T4). The mean values  $\pm$  standard deviation (n = 3–4) are presented. Rt—retention time; nd—not detected.

| Rt<br>(min.)                | Compound                           | GIA CTRL          | GIA DS            | LEC CTRL          | LEC DS            | MAU CTRL          | MAU DS            |
|-----------------------------|------------------------------------|-------------------|-------------------|-------------------|-------------------|-------------------|-------------------|
| <b>sterols and terpenes</b> |                                    |                   |                   |                   |                   |                   |                   |
| 34.0                        | neophytadiene                      | 1.034 $\pm$ 0.002 | nd                | 0.778 $\pm$ 0.007 | nd                | 1.066 $\pm$ 0.221 | 0.361 $\pm$ 0.002 |
| 42.1                        | phytol                             | nd                | nd                | 0.753 $\pm$ 0.003 | nd                | nd                | 0.359 $\pm$ 0.004 |
| 55.4                        | squalene                           | nd                | nd                | 0.604 $\pm$ 0.008 | 0.588 $\pm$ 0.007 | 0.610 $\pm$ 0.004 | 0.798 $\pm$ 0.005 |
| 68.0                        | $\beta$ - amyrin                   | 1.327 $\pm$ 0.367 | 1.187 $\pm$ 0.045 | 0.689 $\pm$ 0.017 | 0.688 $\pm$ 0.081 | 0.735 $\pm$ 0.044 | 0.905 $\pm$ 0.030 |
| 69.0                        | $\alpha$ - amyrin                  | nd                | 1.358 $\pm$ 0.613 | 0.841 $\pm$ 0.022 | 0.905 $\pm$ 0.010 | 0.996 $\pm$ 0.028 | 0.417 $\pm$ 0.002 |
| 72.8                        | lupeol derivatives                 | 1.579 $\pm$ 0.355 | nd                | 1.026 $\pm$ 0.065 | nd                | 1.294 $\pm$ 0.071 | 0.547 $\pm$ 0.040 |
| 73.4                        | ursolic acid                       | 1.922 $\pm$ 0.587 | 1.397 $\pm$ 0.219 | 1.169 $\pm$ 0.086 | 1.228 $\pm$ 0.331 | 1.261 $\pm$ 0.083 | 0.628 $\pm$ 0.058 |
| 73.6                        | ursolic acid aldehyde              | nd                | nd                | 0.861 $\pm$ 0.037 | 0.950 $\pm$ 0.060 | 1.000 $\pm$ 0.065 | 0.380 $\pm$ 0.008 |
| <b>sugars</b>               |                                    |                   |                   |                   |                   |                   |                   |
| 35.5                        | $\alpha$ - D - mannopyranose       | 0.276 $\pm$ 0.003 | nd                | 0.224 $\pm$ 0.004 | 0.217 $\pm$ 0.003 | 0.246 $\pm$ 0.013 | 0.122 $\pm$ 0.008 |
| 37.7                        | D - glucose                        | 0.290 $\pm$ 0.003 | nd                | 0.428 $\pm$ 0.326 | 0.225 $\pm$ 0.007 | 0.263 $\pm$ 0.018 | 0.131 $\pm$ 0.009 |
| <b>alcohols</b>             |                                    |                   |                   |                   |                   |                   |                   |
| 36.3                        | D - sorbitol                       | 1.327 $\pm$ 0.023 | 1.073 $\pm$ 0.010 | 1.172 $\pm$ 0.050 | 1.287 $\pm$ 0.126 | 1.106 $\pm$ 0.090 | 1.282 $\pm$ 0.173 |
| 63.0                        | $\alpha$ - tocopherol              | nd                | 1.343 $\pm$ 0.353 | 0.813 $\pm$ 0.022 | 0.841 $\pm$ 0.175 | nd                | 0.447 $\pm$ 0.019 |
| <b>fatty acids</b>          |                                    |                   |                   |                   |                   |                   |                   |
| 39.2                        | palmitic acid                      | 12.10 $\pm$ 0.204 | 11.20 $\pm$ 0.118 | 9.179 $\pm$ 0.093 | 10.08 $\pm$ 0.359 | 10.72 $\pm$ 0.347 | 4.524 $\pm$ 0.113 |
| 42.8                        | linoleic acid                      | 10.99 $\pm$ 0.003 | 10.43 $\pm$ 0.004 | 8.189 $\pm$ 0.005 | 9.237 $\pm$ 0.238 | 9.624 $\pm$ 0.012 | 3.899 $\pm$ 0.004 |
| 42.9                        | $\alpha$ - linolenic acid          | nd                | 10.64 $\pm$ 0.028 | nd                | nd                | nd                | 4.001 $\pm$ 0.007 |
| 43.1                        | oleic acid                         | 11.21 $\pm$ 0.047 | nd                | 8.599 $\pm$ 0.030 | 10.19 $\pm$ 1.359 | 9.793 $\pm$ 0.053 | nd                |
| 43.2                        | oleic acid derivative              | nd                | nd                | 8.268 $\pm$ 0.006 | 9.191 $\pm$ 0.032 | 9.625 $\pm$ 0.003 | 3.892 $\pm$ 0.004 |
| 43.7                        | stearic acid                       | 11.67 $\pm$ 0.132 | 10.91 $\pm$ 0.082 | 8.797 $\pm$ 0.062 | 9.589 $\pm$ 0.067 | 10.29 $\pm$ 0.217 | 4.287 $\pm$ 0.070 |
| 45.5                        | $\alpha$ - monopalmitin            | 11.09 $\pm$ 0.027 | 10.48 $\pm$ 0.012 | 8.273 $\pm$ 0.012 | 9.169 $\pm$ 0.014 | 9.720 $\pm$ 0.046 | 3.950 $\pm$ 0.014 |
| 50.7                        | $\alpha$ - monopalmitin derivative | 11.25 $\pm$ 0.048 | 10.61 $\pm$ 0.028 | 8.405 $\pm$ 0.029 | 9.278 $\pm$ 0.032 | 9.832 $\pm$ 0.086 | 3.999 $\pm$ 0.023 |
| <b>alkanes</b>              |                                    |                   |                   |                   |                   |                   |                   |
| 57.6                        | long chain alkane 1                | 1.684 $\pm$ 0.021 | 1.589 $\pm$ 0.125 | 1.068 $\pm$ 0.014 | 1.176 $\pm$ 0.078 | 1.389 $\pm$ 0.103 | 0.592 $\pm$ 0.029 |
| 62.6                        | long chain alkane 2                | 2.297 $\pm$ 0.158 | 2.360 $\pm$ 0.435 | 1.448 $\pm$ 0.076 | 1.413 $\pm$ 0.242 | 1.740 $\pm$ 0.188 | 0.731 $\pm$ 0.057 |
| 67.7                        | long chain alkane 3                | 3.245 $\pm$ 0.398 | 2.871 $\pm$ 0.742 | 1.992 $\pm$ 0.133 | 1.860 $\pm$ 0.268 | 2.149 $\pm$ 0.356 | 0.903 $\pm$ 0.089 |
| 73.0                        | long chain alkane 4                | 2.215 $\pm$ 0.505 | 2.371 $\pm$ 1.068 | 1.451 $\pm$ 0.118 | 1.388 $\pm$ 0.248 | 1.381 $\pm$ 0.248 | 0.538 $\pm$ 0.026 |

**Table S9.** Lipophilic profile (mg/g DW) of the **stems** of the Giarraffa (GIA), Leccino (LEC), and Maurino (MAU) cultivars measured under control (CTRL) conditions and exposed to drought stress (DS) before the start of water deprivation (**T0**). The mean values  $\pm$  standard deviation (n = 3–4) are presented. Rt—retention time; nd—not detected.

| Rt (min.)                   | Compound                           | GIA CTRL          | GIA DS            | LEC CTRL          | LEC DS             | MAU CTRL          | MAU DS            |
|-----------------------------|------------------------------------|-------------------|-------------------|-------------------|--------------------|-------------------|-------------------|
| <b>sterols and terpenes</b> |                                    |                   |                   |                   |                    |                   |                   |
| 67.4                        | stigmast-5-ene                     | 0.731 $\pm$ 0.002 | 0.730 $\pm$ 0.003 | 0.720 $\pm$ 0.009 | 0.720 $\pm$ 0.008  | 0.726 $\pm$ 0.012 | 0.727 $\pm$ 0.013 |
| 71.7                        | lupeol derivatives                 | 0.581 $\pm$ 0.003 | 0.582 $\pm$ 0.001 | 0.370 $\pm$ 0.026 | 0.0365 $\pm$ 0.027 | 0.356 $\pm$ 0.005 | 0.356 $\pm$ 0.003 |
| 73.0                        | ursolic acid                       | 0.647 $\pm$ 0.006 | 0.647 $\pm$ 0.003 | 0.490 $\pm$ 0.010 | 0.490 $\pm$ 0.007  | 0.604 $\pm$ 0.006 | 0.603 $\pm$ 0.005 |
| 73.2                        | ursolic acid aldehyde              | 0.595 $\pm$ 0.005 | 0.593 $\pm$ 0.002 | 0.354 $\pm$ 0.006 | 0.353 $\pm$ 0.005  | 0.356 $\pm$ 0.006 | 0.356 $\pm$ 0.003 |
| <b>sugars</b>               |                                    |                   |                   |                   |                    |                   |                   |
| 35.5                        | $\alpha$ - D - mannopyranose       | 0.139 $\pm$ 0.001 | 0.139 $\pm$ 0.001 | 0.097 $\pm$ 0.006 | 0.091 $\pm$ 0.002  | 0.088 $\pm$ 0.001 | 0.087 $\pm$ 0.000 |
| 37.5                        | D - glucose                        | 0.145 $\pm$ 0.005 | 0.143 $\pm$ 0.003 | 0.087 $\pm$ 0.006 | 0.088 $\pm$ 0.003  | 0.087 $\pm$ 0.001 | 0.087 $\pm$ 0.001 |
| 51.4                        | turanose                           | 0.147 $\pm$ 0.006 | 0.145 $\pm$ 0.003 | 0.096 $\pm$ 0.013 | 0.092 $\pm$ 0.006  | 0.349 $\pm$ 0.453 | 0.218 $\pm$ 0.226 |
| <b>alcohols</b>             |                                    |                   |                   |                   |                    |                   |                   |
| 36.2                        | D - sorbitol                       | 0.663 $\pm$ 0.006 | 0.662 $\pm$ 0.005 | 0.782 $\pm$ 0.031 | 0.784 $\pm$ 0.024  | 0.354 $\pm$ 0.005 | 0.353 $\pm$ 0.003 |
| 44.8                        | pentadecan-1-ol derivative         | 0.563 $\pm$ 0.006 | 0.562 $\pm$ 0.002 | 0.391 $\pm$ 0.000 | 0.389 $\pm$ 0.003  | 0.355 $\pm$ 0.005 | 0.354 $\pm$ 0.002 |
| <b>fatty acids</b>          |                                    |                   |                   |                   |                    |                   |                   |
| 39.1                        | palmitic acid                      | 6.475 $\pm$ 0.005 | 6.475 $\pm$ 0.002 | 4.693 $\pm$ 0.006 | 4.691 $\pm$ 0.009  | 5.440 $\pm$ 0.013 | 5.440 $\pm$ 0.023 |
| 42.7                        | $\alpha$ - linolenic acid          | 6.063 $\pm$ 0.005 | 6.064 $\pm$ 0.003 | 3.535 $\pm$ 0.006 | 3.533 $\pm$ 0.001  | 3.973 $\pm$ 0.013 | 3.971 $\pm$ 0.017 |
| 42.9                        | oleic acid                         | 6.109 $\pm$ 0.003 | 6.109 $\pm$ 0.003 | 3.621 $\pm$ 0.009 | 3.620 $\pm$ 0.005  | 4.016 $\pm$ 0.012 | 4.013 $\pm$ 0.010 |
| 43.5                        | stearic acid                       | 6.303 $\pm$ 0.005 | 6.306 $\pm$ 0.004 | 4.244 $\pm$ 0.041 | 4.243 $\pm$ 0.032  | 4.816 $\pm$ 0.006 | 4.814 $\pm$ 0.005 |
| 45.3                        | $\alpha$ - monopalmitin            | 6.107 $\pm$ 0.005 | 6.105 $\pm$ 0.003 | 3.631 $\pm$ 0.001 | 3.632 $\pm$ 0.001  | 4.066 $\pm$ 0.005 | 4.066 $\pm$ 0.005 |
| 45.6                        | palmitic acid derivative 1         | 6.207 $\pm$ 0.005 | 6.207 $\pm$ 0.003 | 3.854 $\pm$ 0.011 | 3.851 $\pm$ 0.004  | 4.325 $\pm$ 0.025 | 4.325 $\pm$ 0.026 |
| 49.3                        | palmitic acid derivative 2         | 6.116 $\pm$ 0.006 | 6.117 $\pm$ 0.003 | 3.513 $\pm$ 0.006 | 3.514 $\pm$ 0.005  | 4.090 $\pm$ 0.010 | 4.089 $\pm$ 0.010 |
| 50.5                        | $\alpha$ - monopalmitin derivative | 6.724 $\pm$ 0.012 | 6.724 $\pm$ 0.003 | 4.410 $\pm$ 0.000 | 4.415 $\pm$ 0.021  | 6.093 $\pm$ 0.030 | 6.089 $\pm$ 0.035 |
| 54.5                        | monostearin                        | 6.759 $\pm$ 0.010 | 6.756 $\pm$ 0.007 | 4.447 $\pm$ 0.015 | 4.442 $\pm$ 0.019  | 6.163 $\pm$ 0.082 | 6.168 $\pm$ 0.050 |

**Table S10.** Lipophilic profile (mg/g DW) of the stems of the Giarraffa, Leccino, and Maurino cultivars measured under control (CTRL) conditions and exposed to drought stress (DS) for two weeks (T2). The mean values  $\pm$  standard deviation (n = 3–4) are presented. Rt—retention time; nd—not detected.

| Rt<br>(min.)                | Compound                              | GIA CTRL          | GIA DS            | LEC CTRL          | LEC DS            | MAU CTRL          | MAU DS            |
|-----------------------------|---------------------------------------|-------------------|-------------------|-------------------|-------------------|-------------------|-------------------|
| <b>sterols and terpenes</b> |                                       |                   |                   |                   |                   |                   |                   |
| 67.4                        | stigmast-5-ene                        | 0.729 $\pm$ 0.004 | 0.733 $\pm$ 0.007 | 0.719 $\pm$ 0.011 | 0.720 $\pm$ 0.008 | 0.727 $\pm$ 0.016 | 0.940 $\pm$ 0.034 |
| 71.7                        | lupeol derivatives                    | 0.582 $\pm$ 0.033 | 0.522 $\pm$ 0.000 | 0.361 $\pm$ 0.041 | 0.494 $\pm$ 0.008 | 0.355 $\pm$ 0.001 | 0.696 $\pm$ 0.002 |
| 73.0                        | ursolic acid                          | 0.647 $\pm$ 0.020 | 0.642 $\pm$ 0.035 | 0.490 $\pm$ 0.011 | 0.596 $\pm$ 0.020 | 0.601 $\pm$ 0.016 | nd                |
| 73.2                        | ursolic acid aldehyde                 | 0.592 $\pm$ 0.022 | 0.612 $\pm$ 0.027 | 0.352 $\pm$ 0.005 | 0.481 $\pm$ 0.022 | 0.355 $\pm$ 0.002 | 0.696 $\pm$ 0.004 |
| <b>sugars</b>               |                                       |                   |                   |                   |                   |                   |                   |
| 35.5                        | $\alpha$ - D -<br>mannopyranose       | 0.139 $\pm$ 0.004 | 0.132 $\pm$ 0.000 | 0.085 $\pm$ 0.002 | nd                | 0.087 $\pm$ 0.000 | 0.171 $\pm$ 0.000 |
| 37.5                        | D - glucose                           | 0.141 $\pm$ 0.003 | 0.135 $\pm$ 0.000 | 0.089 $\pm$ 0.000 | 0.107 $\pm$ 0.000 | 0.087 $\pm$ 0.000 | 0.171 $\pm$ 0.000 |
| 51.4                        | turanose                              | 0.142 $\pm$ 0.004 | 0.135 $\pm$ 5.321 | 0.087 $\pm$ 0.000 | nd                | 0.087 $\pm$ 0.000 | 0.171 $\pm$ 0.000 |
| <b>alcohols</b>             |                                       |                   |                   |                   |                   |                   |                   |
| 36.2                        | D - sorbitol                          | 0.660 $\pm$ 0.024 | 0.705 $\pm$ 0.002 | 0.786 $\pm$ 0.023 | 0.566 $\pm$ 0.005 | 0.353 $\pm$ 0.000 | 0.692 $\pm$ 0.000 |
| 44.8                        | pentadecan-1-ol<br>derivative         | 0.560 $\pm$ 0.008 | 0.546 $\pm$ 0.003 | 0.387 $\pm$ 0.006 | 0.489 $\pm$ 0.011 | 0.353 $\pm$ 0.000 | 0.691 $\pm$ 0.000 |
| <b>fatty acids</b>          |                                       |                   |                   |                   |                   |                   |                   |
| 39.1                        | palmitic acid                         | 6.476 $\pm$ 0.094 | 6.304 $\pm$ 0.002 | 4.688 $\pm$ 0.014 | 5.531 $\pm$ 0.015 | 5.439 $\pm$ 0.033 | 8.191 $\pm$ 0.039 |
| 42.7                        | $\alpha$ - linolenic acid             | 6.064 $\pm$ 0.171 | 5.754 $\pm$ 0.007 | 3.531 $\pm$ 0.006 | 4.743 $\pm$ 0.006 | 3.970 $\pm$ 0.024 | 7.639 $\pm$ 0.001 |
| 42.9                        | oleic acid                            | 6.110 $\pm$ 0.185 | 5.775 $\pm$ 0.006 | 3.619 $\pm$ 0.001 | 4.823 $\pm$ 0.007 | 4.010 $\pm$ 0.012 | 7.639 $\pm$ 0.001 |
| 43.5                        | stearic acid                          | 6.309 $\pm$ 0.093 | 6.141 $\pm$ 0.003 | 4.242 $\pm$ 0.029 | 5.170 $\pm$ 0.008 | 4.811 $\pm$ 0.007 | 8.024 $\pm$ 0.030 |
| 45.3                        | $\alpha$ - monopalmitin               | 6.103 $\pm$ 0.154 | 5.822 $\pm$ 0.001 | 3.634 $\pm$ 0.002 | 4.786 $\pm$ 0.003 | 4.066 $\pm$ 0.013 | 7.639 $\pm$ 0.001 |
| 45.6                        | palmitic acid<br>derivative 1         | 6.206 $\pm$ 0.144 | 5.945 $\pm$ 0.002 | 3.848 $\pm$ 0.006 | 4.935 $\pm$ 0.006 | 4.325 $\pm$ 0.028 | 7.891 $\pm$ 0.035 |
| 49.3                        | palmitic acid<br>derivative 2         | 6.117 $\pm$ 0.154 | 5.834 $\pm$ 0.004 | 3.515 $\pm$ 0.013 | 4.790 $\pm$ 0.005 | 4.089 $\pm$ 0.011 | 7.639 $\pm$ 0.001 |
| 50.5                        | $\alpha$ - monopalmitin<br>derivative | 6.724 $\pm$ 0.190 | 6.380 $\pm$ 0.007 | 4.420 $\pm$ 0.043 | 5.268 $\pm$ 0.003 | 6.085 $\pm$ 0.078 | 8.378 $\pm$ 0.026 |
| 54.5                        | monostearin                           | 6.753 $\pm$ 0.204 | 6.381 $\pm$ 0.005 | 4.438 $\pm$ 0.038 | 5.290 $\pm$ 0.015 | 6.174 $\pm$ 0.082 | 8.364 $\pm$ 0.083 |

**Table S11.** Lipophilic profile (mg/g DW) of the **stems** of the Giarraffa (GIA), Leccino (LEC), and Maurino (MAU) cultivars measured under control (CTRL) conditions and exposed to drought stress (DS) for four weeks (T4). The mean values  $\pm$  standard deviation (n = 3–4) are presented. Rt—retention time; nd—not detected.

| <b>Rt<br/>(min.)</b>        | <b>Compound</b>                       | <b>GIA CTRL</b>   | <b>GIA DS</b>     | <b>LEC CTRL</b>   | <b>LEC DS</b>     |
|-----------------------------|---------------------------------------|-------------------|-------------------|-------------------|-------------------|
| <b>sterols and terpenes</b> |                                       |                   |                   |                   |                   |
| 67.4                        | stigmast-5-ene                        | 0.635 $\pm$ 0.035 | 0.932 $\pm$ 0.028 | 0.882 $\pm$ 0.093 | 0.901 $\pm$ 0.006 |
| 71.7                        | lupeol derivatives                    | 0.418 $\pm$ 0.054 | 0.876 $\pm$ 0.061 | 0.756 $\pm$ 0.000 | nd                |
| 73.0                        | ursolic acid                          | 0.510 $\pm$ 0.056 | 0.970 $\pm$ 0.049 | 0.870 $\pm$ 0.083 | 0.807 $\pm$ 0.005 |
| 73.2                        | ursolic acid aldeyde                  | 0.393 $\pm$ 0.045 | 0.880 $\pm$ 0.089 | nd                | nd                |
| <b>sugars</b>               |                                       |                   |                   |                   |                   |
| 35.5                        | $\alpha$ - D - mannopyranose          | 0.086 $\pm$ 0.001 | 0.184 $\pm$ 0.001 | 0.190 $\pm$ 0.004 | nd                |
| 37.5                        | D - glucose                           | 0.091 $\pm$ 0.000 | 0.188 $\pm$ 0.001 | 0.193 $\pm$ 0.006 | 0.178 $\pm$ 0.000 |
| 51.4                        | turanose                              | 0.087 $\pm$ 0.002 | 0.184 $\pm$ 0.001 | 0.194 $\pm$ 0.007 | nd                |
| <b>alcohols</b>             |                                       |                   |                   |                   |                   |
| 36.2                        | D - sorbitol                          | 0.511 $\pm$ 0.003 | 0.954 $\pm$ 0.008 | 0.990 $\pm$ 0.177 | 0.776 $\pm$ 0.004 |
| 44.8                        | pentadecan-1-ol derivative            | 0.360 $\pm$ 0.002 | 0.730 $\pm$ 0.015 | nd                | 0.732 $\pm$ 0.006 |
| <b>fatty acids</b>          |                                       |                   |                   |                   |                   |
| 39.1                        | palmitic acid                         | 4.419 $\pm$ 0.004 | 8.373 $\pm$ 0.008 | 8.635 $\pm$ 0.254 | 8.341 $\pm$ 0.009 |
| 42.7                        | $\alpha$ - linolenic acid             | 3.616 $\pm$ 0.002 | 8.019 $\pm$ 0.005 | 8.364 $\pm$ 0.055 | 7.877 $\pm$ 0.002 |
| 42.9                        | oleic acid                            | 4.098 $\pm$ 0.004 | 8.252 $\pm$ 0.009 | 8.541 $\pm$ 0.184 | 8.192 $\pm$ 0.004 |
| 43.5                        | stearic acid                          | 3.638 $\pm$ 0.002 | 8.041 $\pm$ 0.003 | 8.350 $\pm$ 0.043 | 7.921 $\pm$ 0.002 |
| 45.3                        | $\alpha$ - monopalmitin               | 3.803 $\pm$ 0.002 | 8.132 $\pm$ 0.000 | 8.419 $\pm$ 0.094 | 8.026 $\pm$ 0.003 |
| 45.6                        | palmitic acid derivative 1            | 3.653 $\pm$ 0.001 | 8.056 $\pm$ 0.001 | 8.363 $\pm$ 0.053 | 7.933 $\pm$ 0.002 |
| 49.3                        | palmitic acid derivative 2            | 4.371 $\pm$ 0.007 | 8.715 $\pm$ 0.004 | 8.865 $\pm$ 0.425 | 8.661 $\pm$ 0.008 |
| 50.5                        | $\alpha$ - monopalmitin<br>derivative | 4.406 $\pm$ 0.009 | 8.751 $\pm$ 0.011 | 8.862 $\pm$ 0.422 | 8.674 $\pm$ 0.006 |
